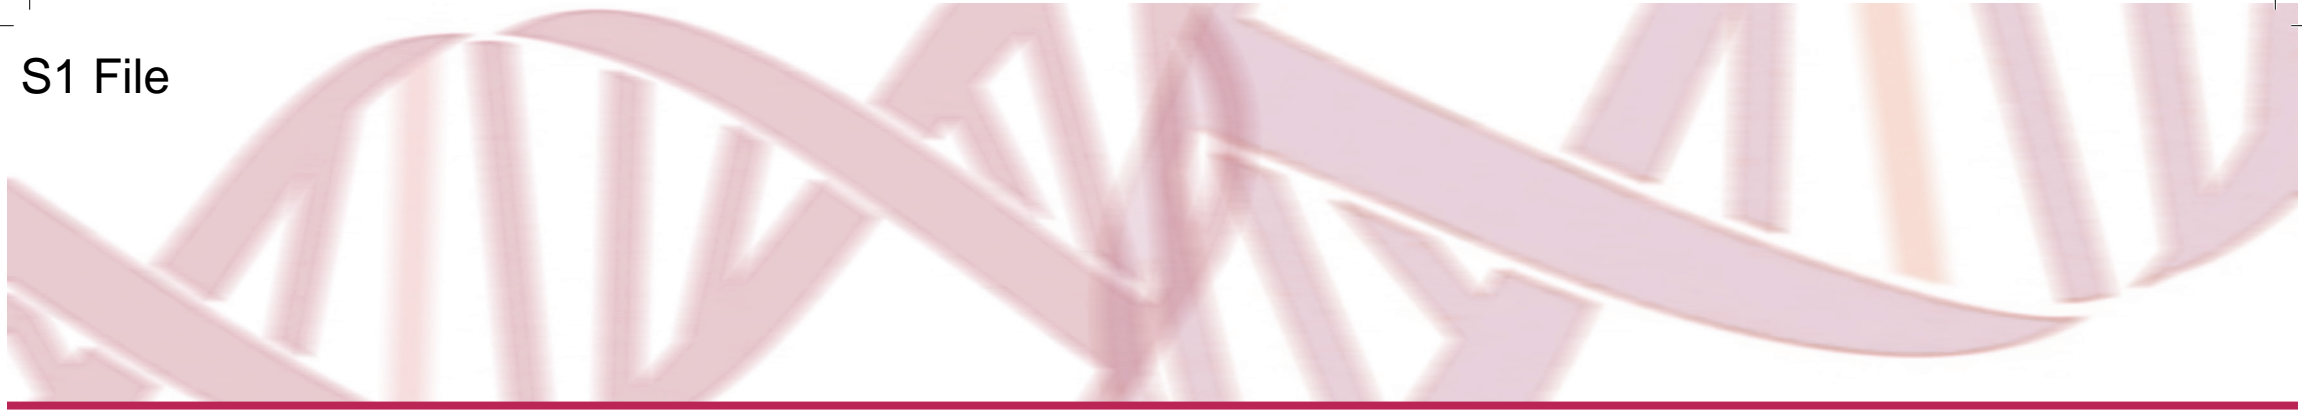

# Counseling Guideline

## Genetic counseling for hereditary breast and ovarian cancer

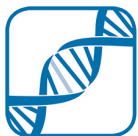



# Motivation

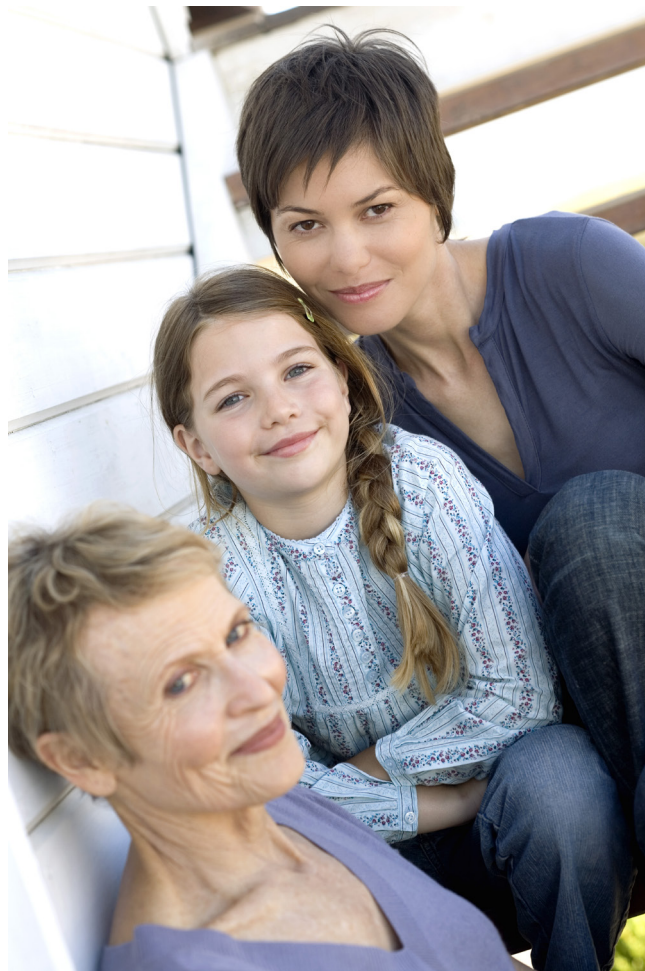

What brings you to  
genetic counseling  
today?





## Stages of consultation

1. Genetic background
2. Family pedigree creation
3. Decision-making
  - medical indication
  - personal decision
  - possible consequences





## Breast and Ovarian Cancer

- One in eight women will develop breast cancer over the course of her lifetime (lifetime risk: 12.5%)
- One out of every 70 woman will develop ovarian cancer at some point in her lifetime (lifetime risk: 1-2%)

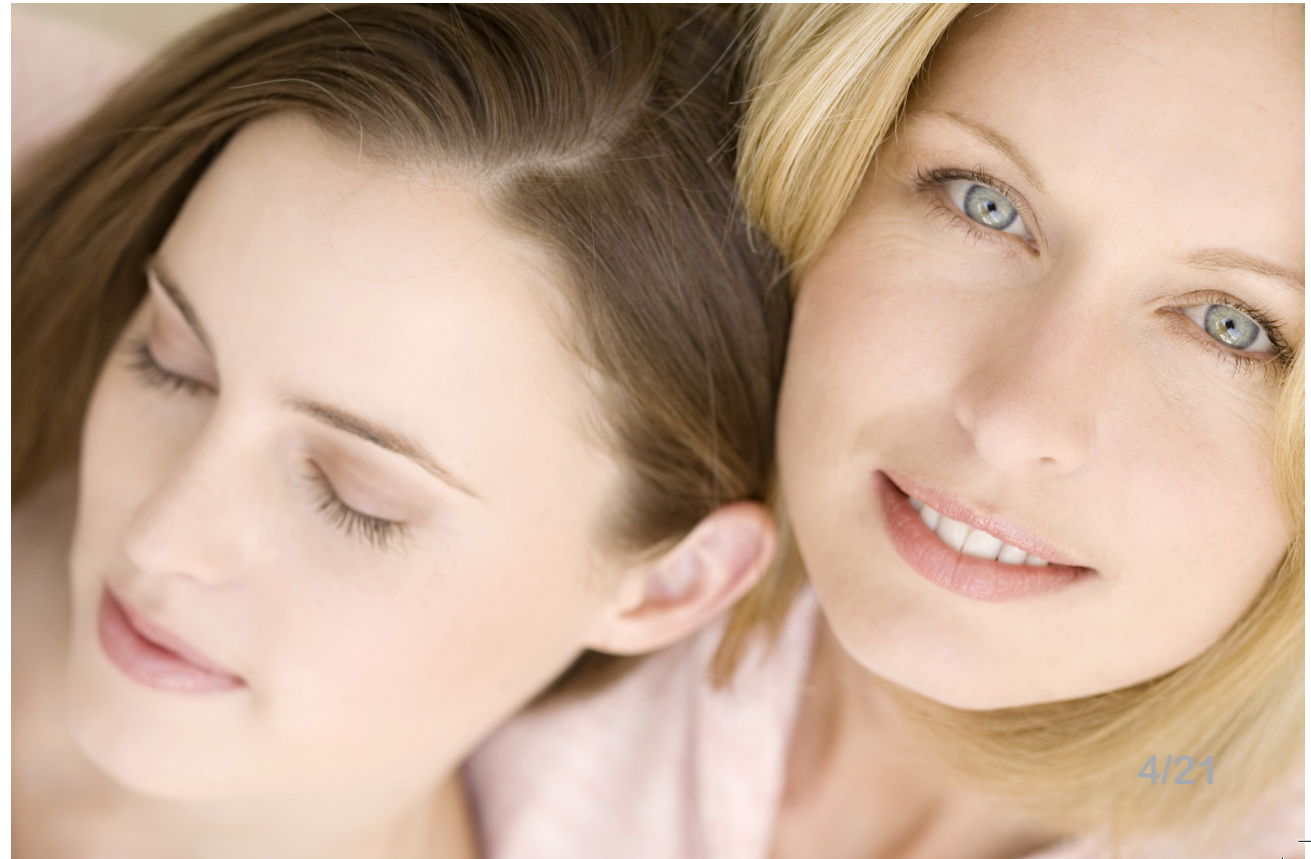

# Genetic Background

- The complete genetic blueprint for your body is found in the nucleus of each cell in the form of DNA
- DNA = deoxyribonucleic acid (deoxyribonucleic acid)
- Gene: Sections of the DNA that determine features of the human body, e.g. blood type, eye color

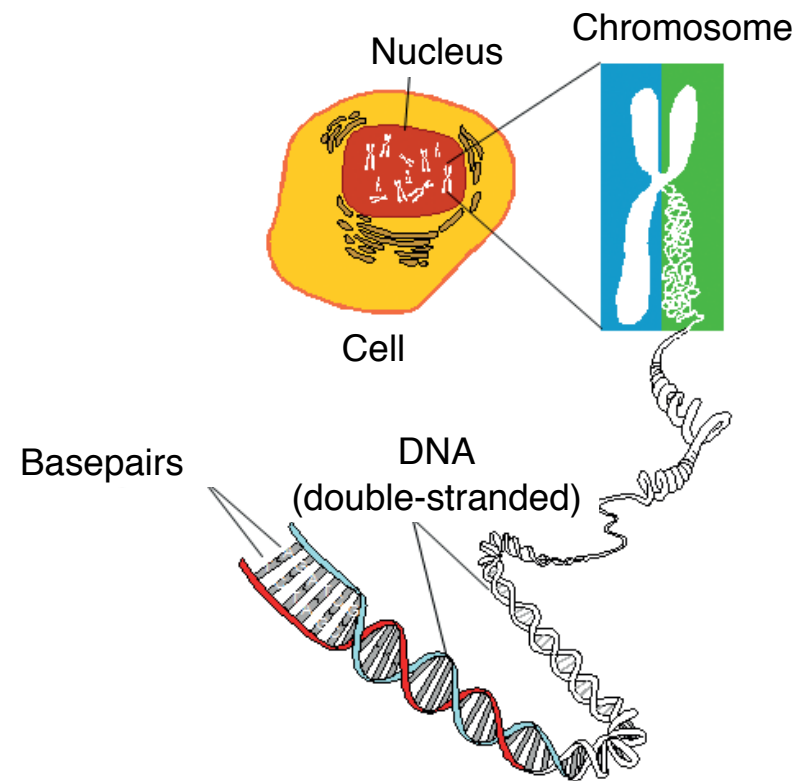

# *BRCA1 and BRCA2*

Since 1994 (*BRCA1*) and 1995 (*BRCA2*) were discovered

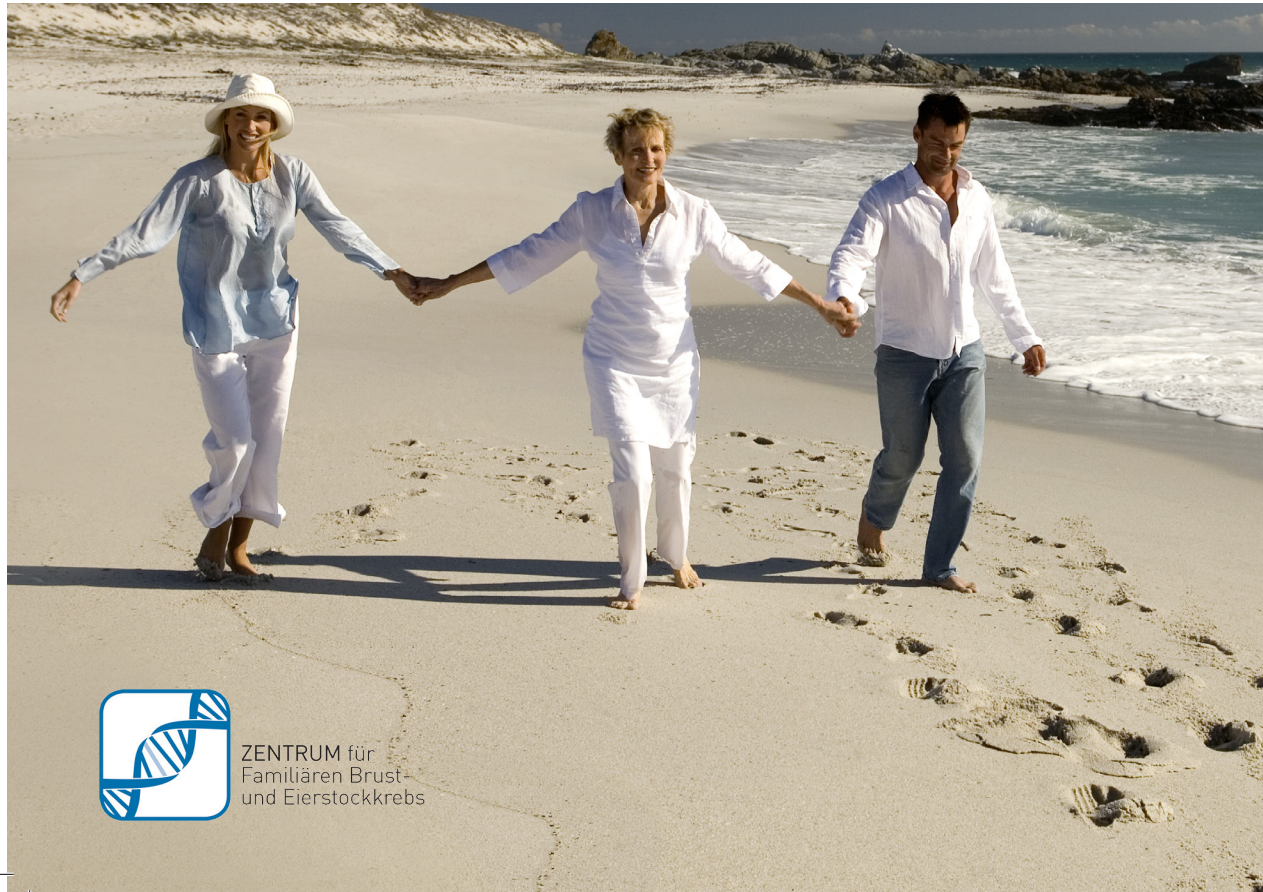

*BRCA1 = BReast CAncer 1*

*BRCA2 = BReast CAncer 2*

- *Repair genes  
(Tumor suppressor genes)*
- *They are very important to avoid cancer*
- *Everyone has it (women and men!)*

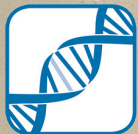



## *BRCA1* and *BRCA2*

What happens with a change (= mutation) in one of these genes?

- Gene modification is innate
- Impaired repair function
  - Strong risk increase for breast and ovarian cancer (and low risk of other cancers)

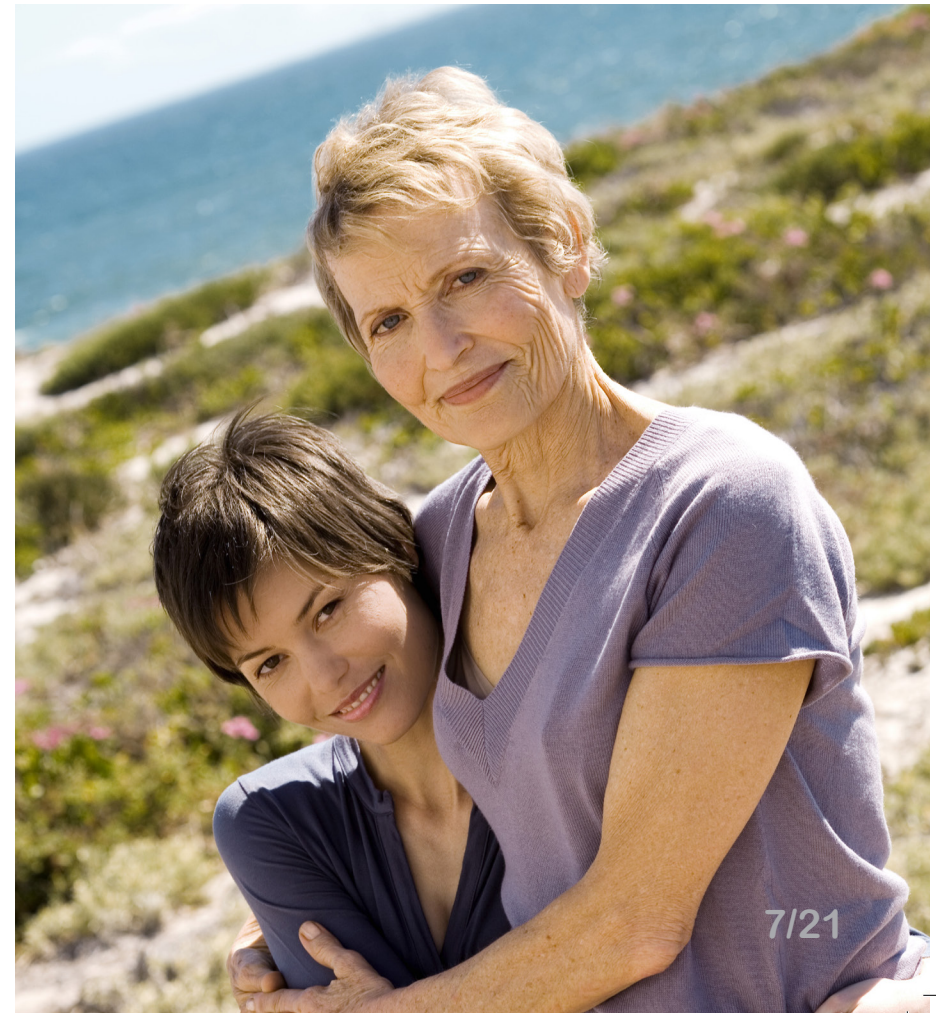

# Genetic breast cancer

- 90-95% sporadic breast cancer
- 5-10% of all breast cancers are inherited, the causes are genetic changes

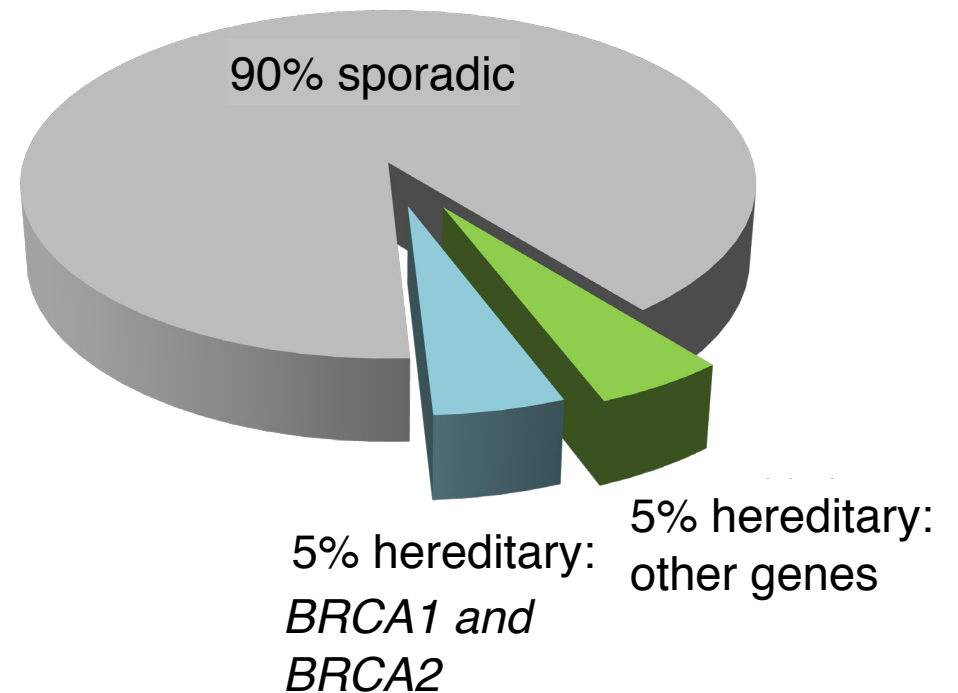

# Frequency of BRCA1 / 2 mutations in the population

Rare!

- BRCA1:  
1 out of 500 people affected
- BRCA2:  
1 of 700 people affected

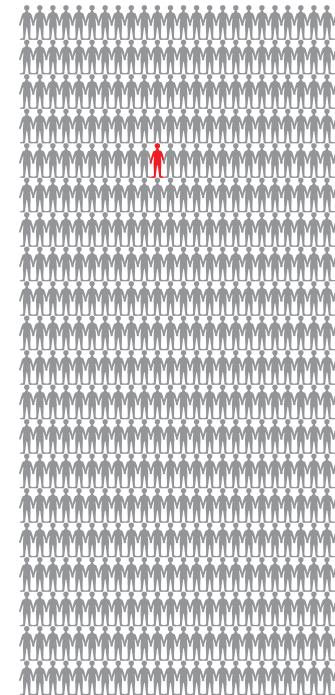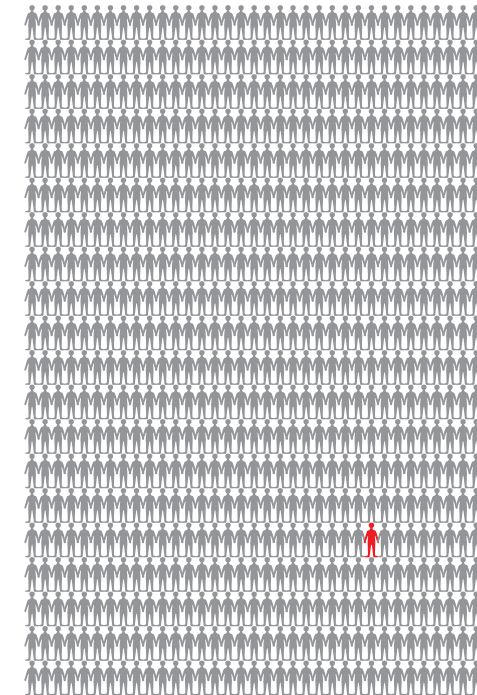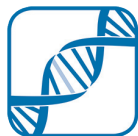

# Heredity

- 50% chance of inheriting the altered gene → it is the same for every child
- Regardless of gender
- Non-carriers cannot pass on genetic change to children  
→ the altered gene cannot skip a generation!

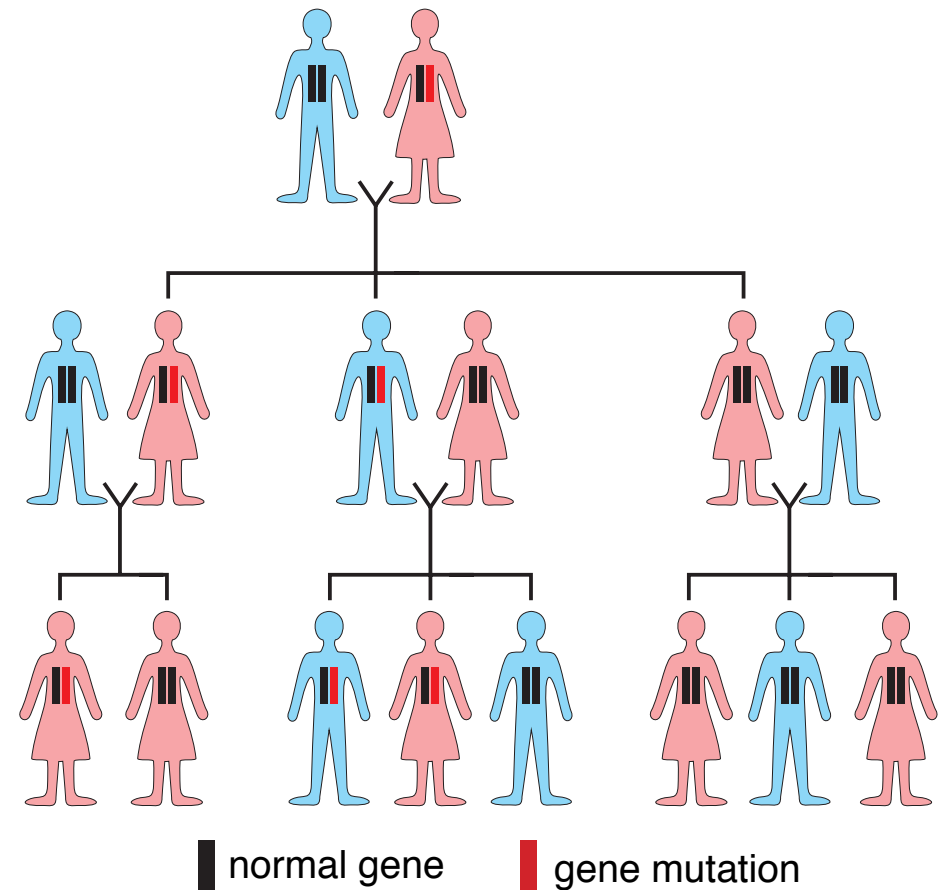

# Create your family tree

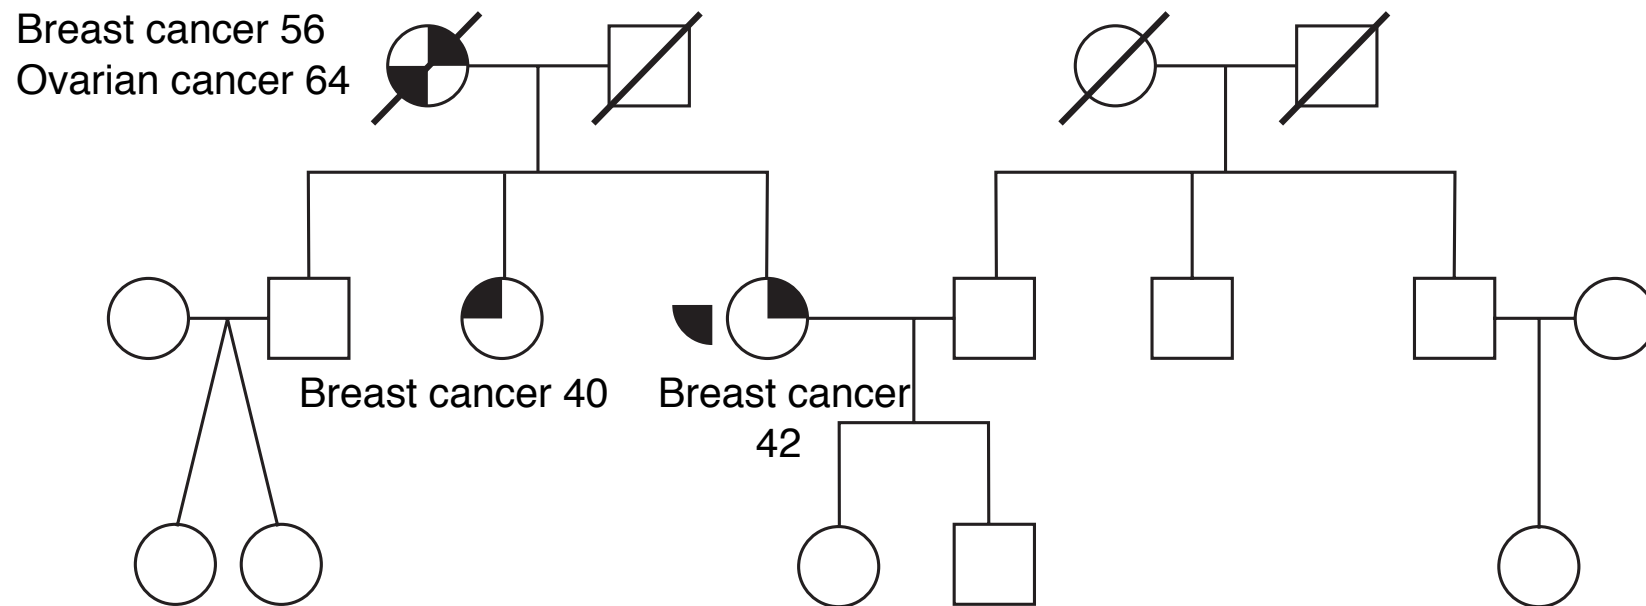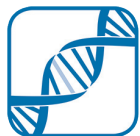



## Medical Indication

- Maternal or paternal line: type and number of cancers, age of onset
- Presence of a familial high-risk constellation?

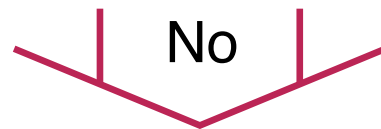

Not high risk;  
No genetic testing necessary

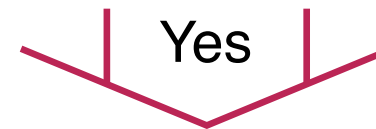

High risk;  
Offer genetic testing





## Possible results I

(if no genetic mutation was found in the family)

| Results              | Risk                                                         |
|----------------------|--------------------------------------------------------------|
| no mutation          | unknown                                                      |
| <b>mutation</b>      | <b>BRCA1: 85% BC, 53% OC</b><br><b>BRCA2: 84% BC, 27% OC</b> |
| unclassified variant | unknown                                                      |



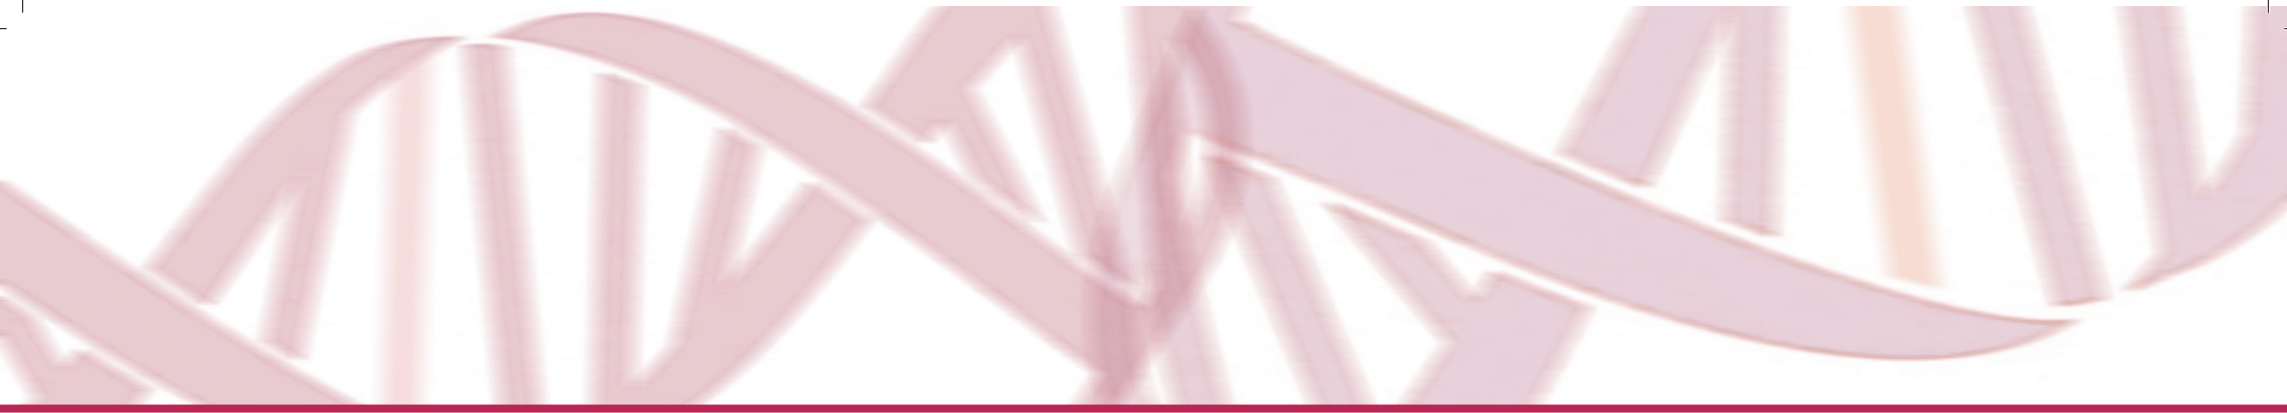

## Possible results II

(if genetic mutation was found in the family)

| Results              | Risk                                                         |
|----------------------|--------------------------------------------------------------|
| no mutation          | General population                                           |
| <b>mutation</b>      | <b>BRCA1: 85% BC, 53% OC</b><br><b>BRCA2: 84% BC, 27% OC</b> |
| unclassified variant | unknown                                                      |



# BRCA disease risk

Disease risk

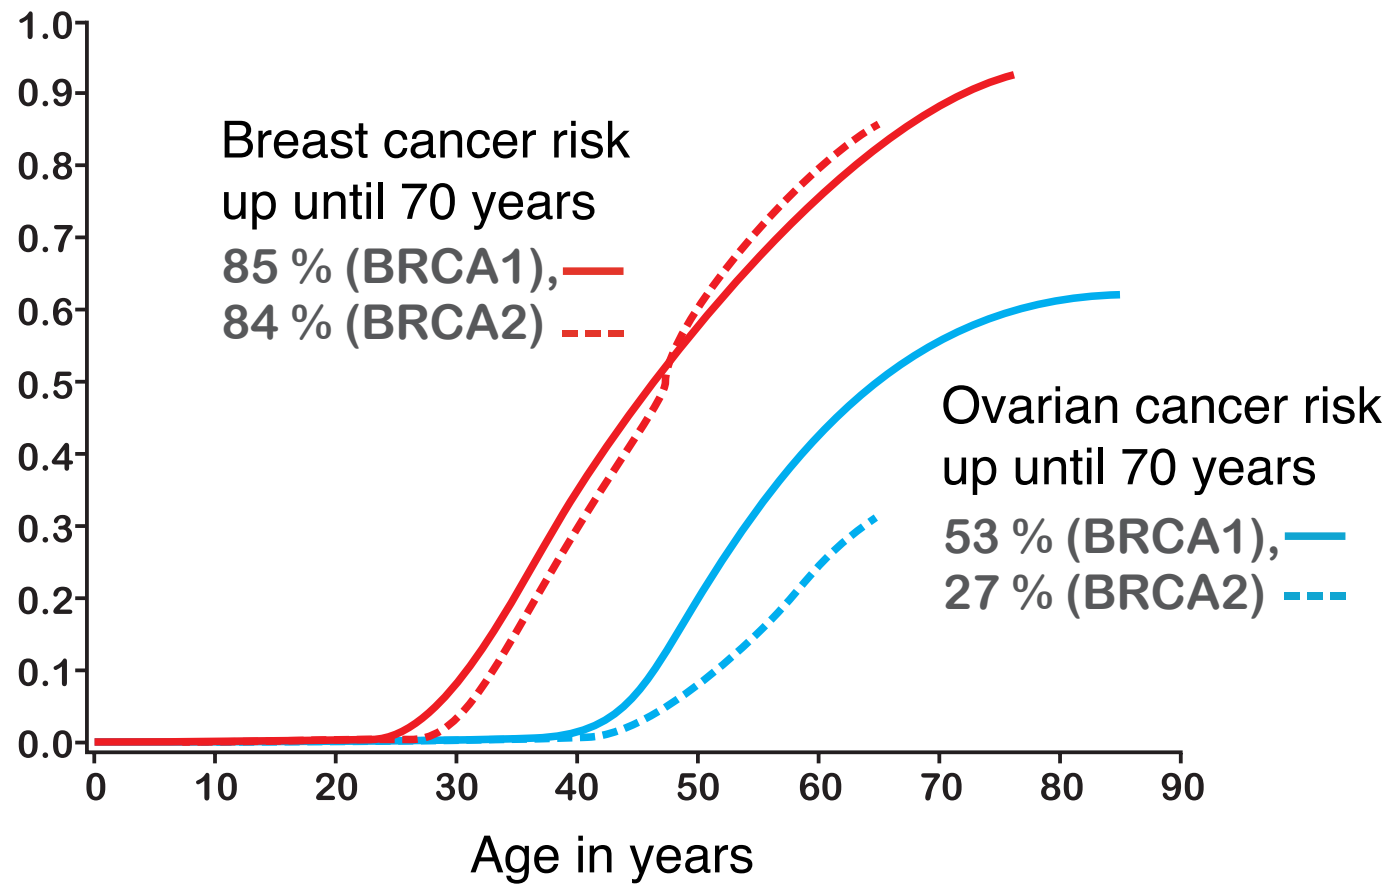



# Possible medical and psychosocial consequences

**Early detection**

**Prevention**



# Screening program

| Type of investigation      | From 18y    | From 25y    | From 35y    | if necessary |
|----------------------------|-------------|-------------|-------------|--------------|
| Gynecological check        | Once a year |             |             |              |
| Medical breast examination | Once a year |             |             |              |
| Breast ultrasound          |             |             |             | x            |
| Mammography                |             |             | Once a year |              |
| Breast MRI                 |             | Once a year |             |              |
| Vaginal ultrasound         |             |             | Once a year |              |
| Tumor marker               |             |             | Once a year |              |

Guideline of the Austrian Society for Senology, Austrian Society for Obgyn., Austrian Society for Surgery, Austrian Society for Radiology

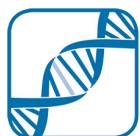

# Preventive Surgeries

- Preventive removal of the breast tissue (prophylactic mastectomy)
- Preventive removal of ovaries and fallopian tubes (prophylactic ovariectomy, prophylactic bilateral salpingo-oophorectomy)

Risk of developing cancer, %

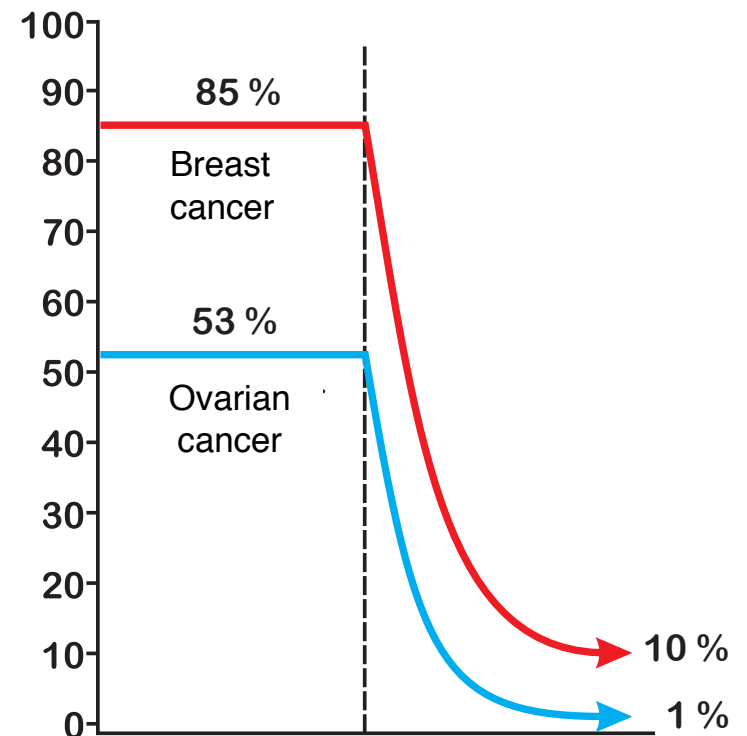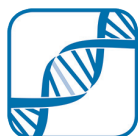



## Necessary considerations before an investigation:

- How would you integrate an unfavorable result into your life?
- Which consequences would you presumably draw (e.g. early detection / preventive surgeries etc.)?
- Who would you tell about the gene mutation?
- How would you handle the information that your children might be affected by the hereditary disease risk?

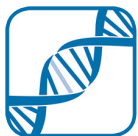

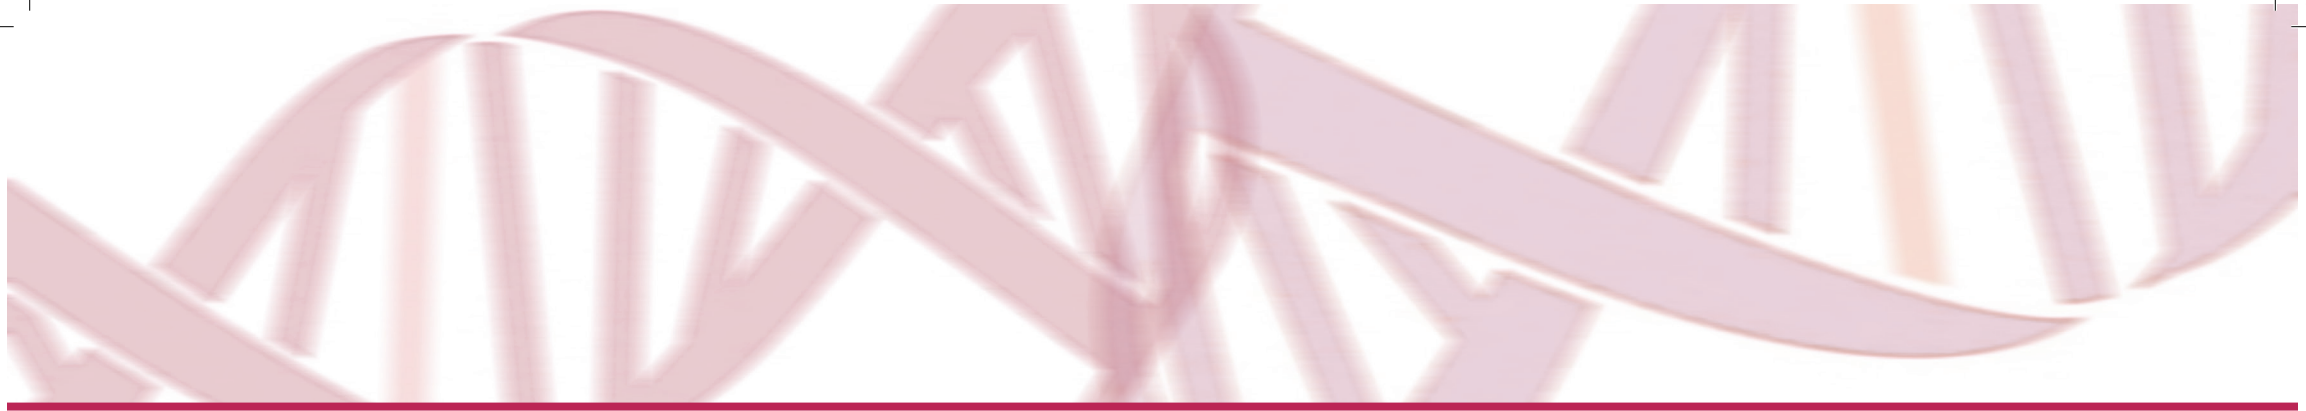

## Further process

- Invitation to disclosure of test results
- Right to know i.e. to decide if you want to know the result or not

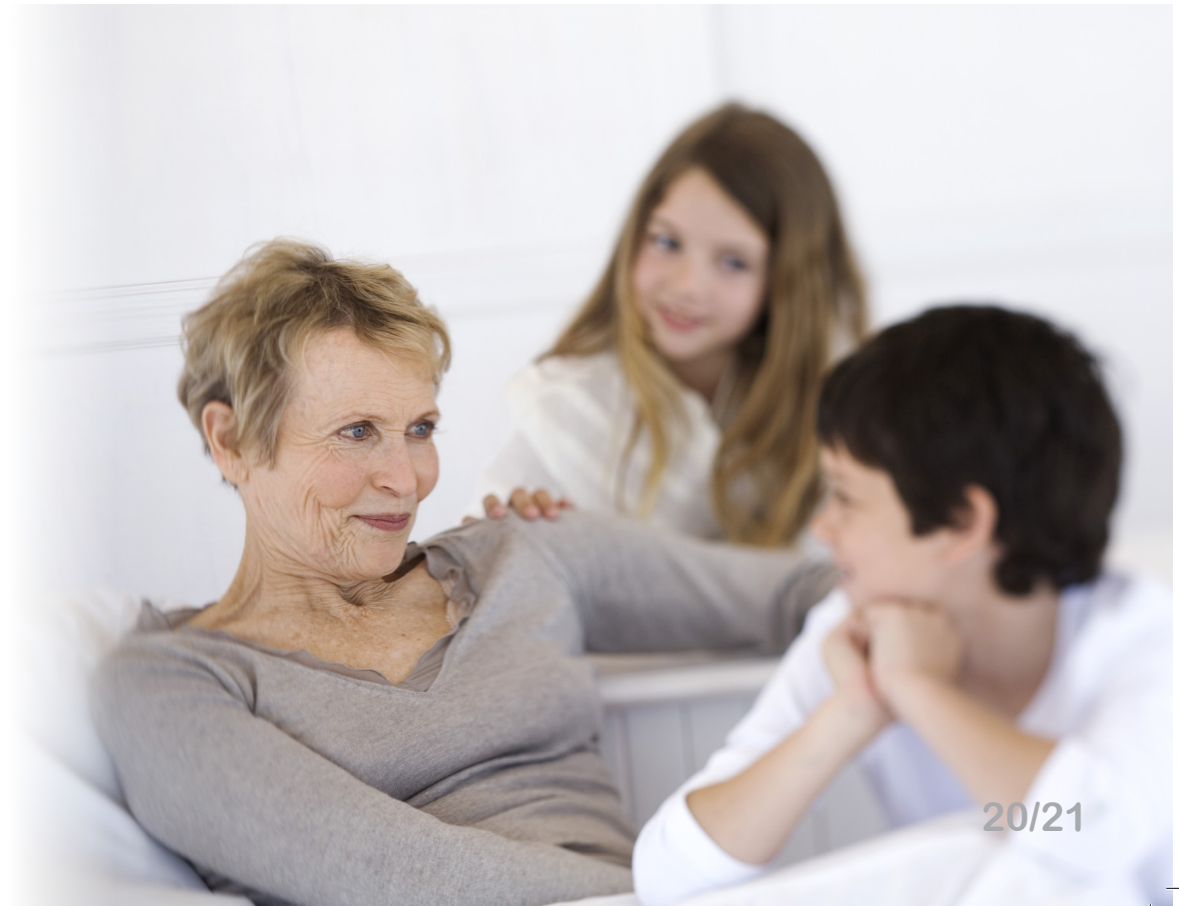

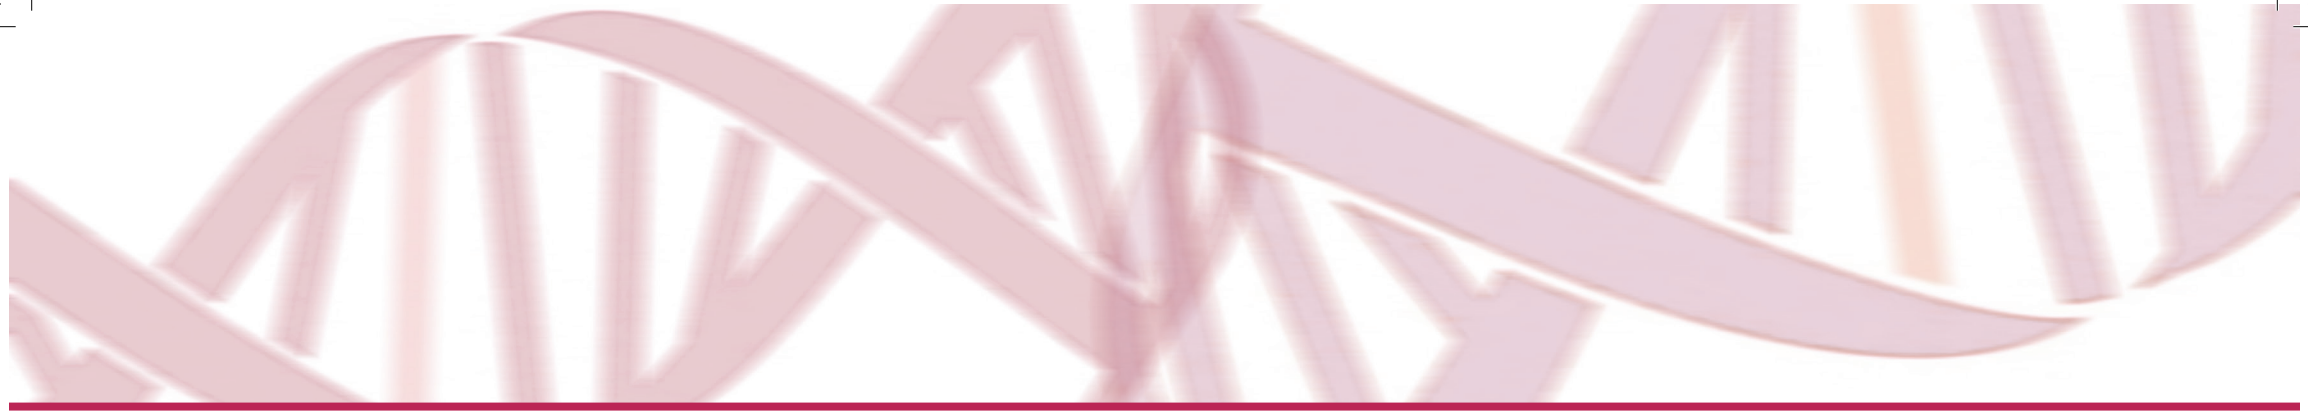

For more information:

[www.brustgenberatung.at](http://www.brustgenberatung.at)



ZENTRUM für  
Familiären Brust-  
und Eierstockkrebs
