## S2 File

### Questionnaire (with answers in green)

1) What does *BRCA1/2* mean?

- A. Breast cancer antibody 1/2
- B. Breast cancer gene 1/2
- C. A breast-specific hormone
- D. A tumor marker

2) How high is the risk of breast cancer when there is a mutation in the *BRCA* gene?

- A. 13%
- B. 26%
- C. 80%
- D. 100%

3) What is the risk of ovarian cancer when there is a mutation in the *BRCA* gene?

- A. 1-2%
- B. 60%
- C. 80%
- D. No increased risk

4) How high is the risk of passing on a mutation to the next generation?

- A. 50%
- B. 100%
- C. 25%
- D. 75%

5) Who can be a carrier of a *BRCA* mutation?

- A. Only women
- B. Men only
- C. Women after 50 years of age
- D. Women and men

6) What are the possible results of genetic testing?

- A. Grey result (UV), white result (no mutation), black result (mutation = change)
- B. Black result (mutation), white result (no mutation)
- C. White result (no mutation), grey result (UV)
- D. Black result (mutation), grey Result (UV)

7) What is the only option to significantly reduce the risk of BC and OC when there is a *BRCA* mutation?

- A. Once a year mammography
- B. Preventive surgery (removal of breast tissue and/or removal of ovaries)
- C. Once a year magnetic resonance tomography (MRI)
- D. Regular check of tumor markers for breast and ovarian cancer
